# Supplementary material for: Molecular Profiles of Pre- and Postoperative Breast Cancer Tumours Reveal Differentially Expressed Genes
Source: PubMed Central journal article supplement (PMC3513735; doi:10.5402/2012/450267), 2012-11-26
Supplement: 450267.f1.pdf [file 450267.f1.pdf]

**Supplementary table 1** Significantly differently expressed genes between pre- and postoperative samples. All probes with FDR < 2.5% ranked according to SAM. Systematic names shown in brackets.

| Gene Name  | Agilent ID   | Description                                                                                                                | SAM    |     |     |       | Fold change |            |
|------------|--------------|----------------------------------------------------------------------------------------------------------------------------|--------|-----|-----|-------|-------------|------------|
|            |              |                                                                                                                            | Called | FSN | FDR | q-val | mean        | Range      |
| PACSIN2    | A_32_P38145  | cDNA DKFZp434H1130 (from clone DKFZp434H1130), [AL136845]                                                                  | 1      | 0   | 0   | 0     | 2,03        | 0,53-2,55  |
| PLA2G3     | A_23_P17814  | phospholipase A2, group III (PLA2G3), mRNA [NM_015715]                                                                     | 2      | 0   | 0   | 0     | 2,2         | 0,11-4,07  |
| MALAT1     | A_24_P497244 | metastasis associated lung adenocarcinoma transcript 1 (non-protein coding) (MALAT1), non-coding RNA [NR_002819]           | 3      | 0   | 0   | 0     | 3,54        | 1,31-9,97  |
| DAK        | A_23_P36129  | dihydroxyacetone kinase 2 homolog (S, cerevisiae) (DAK), mRNA [NM_015533]                                                  | 4      | 0   | 0   | 0     | 1,71        | 0,36-2,65  |
| HISPPD2A   | A_23_P205818 | histidine acid phosphatase domain containing 2A (HISPPD2A), transcript variant 4, mRNA [NM_001024463]                      | 5      | 0   | 0   | 0     | 1,71        | 0,76-3,01  |
| PCDH1      | A_23_P213359 | protocadherin 1 (PCDH1), transcript variant 1, mRNA [NM_002587]                                                            | 6      | 0   | 0   | 0     | 1,64        | 0,38-3,45  |
| DUSP9      | A_24_P417189 | dual specificity phosphatase 9 (DUSP9), mRNA [NM_001395]                                                                   | 7      | 0   | 0   | 0     | 2,12        | 1,15-2,88  |
| DFNB31     | A_24_P376129 | cDNA FLJ31628 fis, clone NT2R12003344, [AK056190]                                                                          | 8      | 0   | 0   | 0     | 3,15        | 1,30-5,69  |
| KIAA1305   | A_23_P129005 | KIAA1305 (KIAA1305), mRNA [NM_025081]                                                                                      | 9      | 0   | 0   | 0     | 1,65        | 1,11-2,19  |
| RAB17      | A_23_P5778   | RAB17, member RAS oncogene family (RAB17), mRNA [NM_022449]                                                                | 10     | 0   | 0   | 0     | 1,84        | 0,23-4,36  |
| NCK2       | A_23_P50962  | NCK adaptor protein 2 (NCK2), transcript variant 1, mRNA [NM_003581]                                                       | 11     | 0   | 0   | 0     | 1,9         | 1,00-4,13  |
| LMBRD2     | A_32_P8952   | LMBR1 domain containing 2 (LMBRD2), mRNA [NM_001007527]                                                                    | 12     | 0   | 0   | 0     | 1,79        | 1,08-3,63  |
| THC2610143 | A_32_P124580 | aa43f10.r1 Soares_NhHMPu_S1 Homo sapiens cDNA clone IMAGE:823723 5', mRNA sequence [AA490192]                              | 13     | 0   | 0   | 0     | 1,61        | 1,01-2,43  |
| HES1       | A_23_P6596   | hairy and enhancer of split 1, (Drosophila) (HES1), mRNA [NM_005524]                                                       | 14     | 0   | 0   | 0     | 1,87        | 0,77-4,18  |
| STARD13    | A_24_P210420 | StAR-related lipid transfer (START) domain containing 13 (STARD13), transcript variant alpha, mRNA [NM_178006]             | 15     | 0   | 0   | 0     | 1,44        | 0,28-2,15  |
| RHOB       | A_23_P51136  | ras homolog gene family, member B (RHOB), mRNA [NM_004040]                                                                 | 16     | 0   | 0   | 0     | 1,99        | 0,51-2,96  |
| AK075052   | A_24_P726399 | cDNA FLJ90571 fis, clone OVARC1001725, highly similar to Homo sapiens patched related protein TRC8 (TRC8) gene, [AK075052] | 17     | 0   | 0   | 0     | 2,52        | 0,88-2,97  |
| CYP2D6     | A_23_P143734 | cytochrome P450, family 2, subfamily D, polypeptide 6 (CYP2D6), transcript variant 1, mRNA [NM_000106]                     | 18     | 0   | 0   | 0     | 1,65        | 0,58-3,55  |
| C10orf10   | A_24_P329795 | chromosome 10 open reading frame 10 (C10orf10), mRNA [NM_007021]                                                           | 19     | 0   | 0   | 0     | 2,08        | 0,88-18,37 |
| EEA1       | A_23_P76159  | early endosome antigen 1 (EEA1), mRNA [NM_003566]                                                                          | 20     | 0   | 0   | 0     | 1,4         | 0,33-1,84  |
| CX3CL1     | A_24_P390495 | chemokine (C-X3-C motif) ligand 1 (CX3CL1), mRNA [NM_002996]                                                               | 21     | 0   | 0   | 0     | 2,99        | 0,90-4,09  |

| Gene Name    | Agilent ID   | Description                                                                                                        | SAM    |       |       |       | Fold change |            |
|--------------|--------------|--------------------------------------------------------------------------------------------------------------------|--------|-------|-------|-------|-------------|------------|
|              |              |                                                                                                                    | Called | FSN   | FDR   | q-val | mean        | Range      |
| BC039457     | A_24_P368023 | cDNA clone IMAGE:5312122, [BC039457]                                                                               | 22     | 0     | 0     | 0     | 1,56        | 0,95-2,09  |
| A_23_P206135 | A_23_P206135 | Unknown                                                                                                            | 23     | 0     | 0     | 0     | 1,71        | 0,51-2,51  |
| ANAPC2       | A_23_P253068 | anaphase promoting complex subunit 2 (ANAPC2), mRNA [NM_013366]                                                    | 24     | 0     | 0     | 0     | 1,74        | 0,45-3,58  |
| BCR          | A_24_P15270  | breakpoint cluster region (BCR), transcript variant 1, mRNA [NM_004327]                                            | 25     | 0     | 0     | 0     | 1,6         | 0,63-2,90  |
| A_24_P593733 | A_24_P593733 | Unknown                                                                                                            | 26     | 0     | 0     | 0     | 1,9         | 0,55-3,66  |
| RASD1        | A_24_P348006 | RAS, dexamethasone-induced 1 (RASD1), mRNA [NM_016084]                                                             | 27     | 0     | 0     | 0     | 2,69        | 0,85-12,90 |
| PQLC1        | A_24_P181677 | PQ loop repeat containing 1 (PQLC1), mRNA [NM_025078]                                                              | 28     | 0     | 0     | 0     | 1,6         | 0,97-2,25  |
| CIITA        | A_23_P353478 | CIITA-8 MHC class II transactivator CIITA mRNA, complete cds, [U18259]                                             | 29     | 0,713 | 2,458 | 1,485 | 0,52        | 0,15-3,01  |
| ANKRD35      | A_23_P325690 | ankyrin repeat domain 35 (ANKRD35), mRNA [NM_144698]                                                               | 30     | 0,713 | 2,377 | 1,296 | 1,93        | 0,11-3,82  |
| LRRC1        | A_23_P377350 | cDNA FLJ11834 fis, clone HEMBA1006583, weakly similar to Drosophila melanogaster Scribble (scrib) mRNA, [AK021896] | 31     | 0,713 | 2,3   | 1,296 | 1,79        | 0,99-4,69  |
| BX110908     | A_32_P4172   | Soares_testis_NHT Homo sapiens cDNA clone IMAGp998G162577, mRNA sequence [BX110908]                                | 32     | 0,713 | 2,228 | 1,485 | 0,54        | 0,19-4,04  |
| C21orf58     | A_23_P132139 | chromosome 21 open reading frame 58 (C21orf58), mRNA [NM_058180]                                                   | 33     | 0,713 | 2,16  | 1,296 | 1,96        | 0,68-3,73  |
| AK098372     | A_24_P238649 | cDNA FLJ25506 fis, clone CBR05185, [AK098372]                                                                      | 34     | 0,713 | 2,097 | 1,296 | 1,66        | 0,42-5,33  |
| AB040974     | A_24_P940218 | mRNA for KIAA1541 protein, partial cds, [AB040974]                                                                 | 35     | 0,713 | 2,037 | 1,296 | 1,91        | 1,20-6,61  |
| FBXW4P1      | A_23_P252603 | F-box protein Fbw3 (FBW3) mRNA, complete cds, [AF174606]                                                           | 36     | 0,713 | 1,98  | 1,296 | 2,1         | 0,39-5,90  |
| NCAPG2       | A_23_P168747 | non-SMC condensin II complex, subunit G2 (NCAPG2), mRNA [NM_017760]                                                | 37     | 0,713 | 1,927 | 1,296 | 2,81        | 0,77-8,76  |
| ADAMTS1      | A_23_P211039 | ADAM metalloproteinase with thrombospondin type 1 motif, 1 (ADAMTS1), mRNA [NM_006988]                             | 38     | 0,713 | 1,876 | 1,296 | 2,45        | 0,80-11,37 |
| THC2505349   | A_32_P48856  | ALU6_HUMAN (P39193) Alu subfamily SP sequence contamination warning entry, partial (13%) [THC2505349]              | 39     | 0,713 | 1,828 | 1,485 | 0,77        | 0,70-1,67  |
| TRIB1        | A_23_P123503 | tribbles homolog 1 (Drosophila) (TRIB1), mRNA [NM_025195]                                                          | 40     | 0,713 | 1,782 | 1,296 | 1,69        | 0,82-3,72  |
| LOC392335    | A_32_P223173 | PREDICTED: Homo sapiens misc_RNA (LOC392335), miscRNA [XR_037043]                                                  | 41     | 0,713 | 1,739 | 1,296 | 1,72        | 0,52-3,00  |
| MAPK3        | A_23_P37910  | mitogen-activated protein kinase 3 (MAPK3), transcript variant 1, mRNA [NM_002746]                                 | 42     | 0,713 | 1,698 | 1,296 | 2,01        | 0,40-2,55  |
| C4orf23      | A_24_P320171 | chromosome 4 open reading frame 23 (C4orf23), transcript variant 2, mRNA [NM_152544]                               | 43     | 0,713 | 1,658 | 1,296 | 1,87        | 0,50-4,59  |
| TMEM49       | A_32_P9753   | transmembrane protein 49, mRNA (cDNA clone IMAGE:4295896), with apparent retained intron, [BC024020]               | 44     | 0,713 | 1,62  | 1,296 | 2,09        | 1,10-5,02  |
| PTPRE        | A_24_P213494 | protein tyrosine phosphatase, receptor type, E (PTPRE), transcript variant 1, mRNA [NM_006504]                     | 45     | 0,713 | 1,584 | 1,485 | 0,38        | 0,16-1,10  |
| SH2D3A       | A_24_P262728 | SH2 domain containing 3A (SH2D3A), mRNA [NM_005490]                                                                | 46     | 0,713 | 1,55  | 1,296 | 1,5         | 0,30-2,74  |
| BC036645     | A_24_P570806 | cDNA clone IMAGE:4814437, [BC036645]                                                                               | 47     | 0,713 | 1,517 | 1,296 | 1,57        | 0,74-2,54  |

| Gene Name    | Agilent ID   | Description                                                                                | SAM    |       |       |       | Fold change |            |
|--------------|--------------|--------------------------------------------------------------------------------------------|--------|-------|-------|-------|-------------|------------|
|              |              |                                                                                            | Called | FSN   | FDR   | q-val | mean        | Range      |
| AA455656     | A_32_P92415  | aa22e03,s1 NCL_CGAP_GCB1 Homo sapiens cDNA clone IMAGE:814012 3', mRNA sequence [AA455656] | 48     | 0,713 | 1,485 | 1,485 | 0,6         | 0,43-1,81  |
| RXRΒ         | A_23_P59179  | retinoid X receptor, beta (RXRB), mRNA [NM_021976]                                         | 49     | 0,713 | 1,455 | 1,296 | 1,97        | 0,70-3,71  |
| ECHDC2       | A_24_P225477 | enoyl Coenzyme A hydratase domain containing 2 (ECHDC2), mRNA [NM_018281]                  | 50     | 0,713 | 1,426 | 1,296 | 1,85        | 0,59-3,37  |
| EDC4         | A_24_P399009 | enhancer of mRNA decapping 4 (EDC4), mRNA [NM_014329]                                      | 51     | 0,713 | 1,398 | 1,296 | 1,77        | 0,59-2,60  |
| CASKIN2      | A_24_P48187  | CASK interacting protein 2 (CASKIN2), transcript variant 1, mRNA [NM_020753]               | 52     | 0,713 | 1,371 | 1,296 | 1,77        | 0,82-2,78  |
| HSPG2        | A_23_P23191  | heparan sulfate proteoglycan 2 (HSPG2), mRNA [NM_005529]                                   | 53     | 0,713 | 1,345 | 1,296 | 2,01        | 0,45-2,77  |
| SF3B3        | A_23_P135914 | splicing factor 3b, subunit 3, 130kDa (SF3B3), mRNA [NM_012426]                            | 54     | 0,713 | 1,32  | 1,296 | 1,4         | 0,92-2,85  |
| CTA-216E10,6 | A_23_P132341 | hypothetical FLJ23584 (FLJ23584), mRNA [NM_001142964]                                      | 55     | 0,713 | 1,296 | 1,296 | 1,37        | 0,45-3,12  |
| PRDM11       | A_23_P13057  | PR domain containing 11 (PRDM11), mRNA [NM_020229]                                         | 56     | 1,426 | 2,546 | 1,44  | 1,65        | 0,50-2,84  |
| A_24_P900555 | A_24_P900555 | Unknown                                                                                    | 57     | 1,426 | 2,502 | 1,44  | 1,59        | 0,72-3,87  |
| ITPKC        | A_23_P208369 | inositol 1,4,5-trisphosphate 3-kinase C (ITPKC), mRNA [NM_025194]                          | 58     | 1,426 | 2,458 | 1,44  | 1,47        | 0,71-2,04  |
| ZZEF1        | A_23_P130107 | cDNA FLJ10821 fis, clone NT2RP4001057, [AK001683]                                          | 59     | 1,426 | 2,417 | 1,44  | 1,48        | 1,04-2,55  |
| AZI1         | A_24_P66522  | 5-azacytidine induced 1 (AZI1), transcript variant 1, mRNA [NM_014984]                     | 60     | 1,426 | 2,377 | 1,44  | 1,76        | 0,28-3,90  |
| C1orf183     | A_24_P336577 | chromosome 1 open reading frame 183 (C1orf183), transcript variant 1, mRNA [NM_019099]     | 61     | 1,426 | 2,338 | 1,44  | 1,65        | 1,02-2,14  |
| AK123264     | A_24_P930088 | cDNA FLJ41270 fis, clone BRAMY2036387, [AK123264]                                          | 62     | 1,426 | 2,3   | 1,55  | 0,27        | 0,07-1,41  |
| SIK2         | A_23_P138957 | salt-inducible kinase 2 (SIK2), mRNA [NM_015191]                                           | 63     | 1,426 | 2,263 | 1,44  | 2,3         | 0,99-10,33 |
| FLJ38359     | A_24_P163009 | cDNA FLJ38359 fis, clone FEBRA2000321, [AK095678]                                          | 64     | 1,426 | 2,228 | 1,44  | 3,04        | 0,80-25,23 |
| HEATR5B      | A_32_P389118 | HEAT repeat containing 5B (HEATR5B), mRNA [NM_019024]                                      | 65     | 1,426 | 2,194 | 1,44  | 1,33        | 1,05-2,25  |
| SC4MOL       | A_23_P110184 | sterol-C4-methyl oxidase-like (SC4MOL), transcript variant 1, mRNA [NM_006745]             | 66     | 1,426 | 2,16  | 1,44  | 1,76        | 0,52-2,25  |
| ERO1LB       | A_23_P347618 | ERO1-like beta (S, cerevisiae) (ERO1LB), mRNA [NM_019891]                                  | 67     | 1,426 | 2,128 | 1,44  | 1,54        | 0,57-2,29  |
| TAX1BP3      | A_23_P38468  | Tax1 (human T-cell leukemia virus type I) binding protein 3 (TAX1BP3), mRNA [NM_014604]    | 68     | 1,426 | 2,097 | 1,44  | 1,39        | 0,45-2,49  |
| MBD6         | A_32_P411592 | methyl-CpG binding domain protein 6 (MBD6), mRNA [NM_052897]                               | 69     | 1,426 | 2,067 | 1,44  | 1,76        | 0,72-3,95  |
| WDR26        | A_24_P42803  | WD repeat domain 26 (WDR26), transcript variant 1, mRNA [NM_025160]                        | 70     | 1,426 | 2,037 | 1,44  | 1,97        | 0,62-2,74  |
| A_32_P82119  | A_32_P82119  | Unknown                                                                                    | 71     | 1,426 | 2,008 | 1,44  | 1,73        | 0,82-4,26  |
| MYO10        | A_24_P46357  | myosin X (MYO10), mRNA [NM_012334]                                                         | 72     | 1,426 | 1,98  | 1,44  | 2,68        | 1,08-5,29  |
| GOLGA2       | A_24_P910297 | golgi autoantigen, golgin subfamily a, 2 (GOLGA2), mRNA [NM_004486]                        | 73     | 1,426 | 1,953 | 1,44  | 1,75        | 0,73-2,63  |

| Gene Name    | Agilent ID   | Description                                                                                                                                                          | SAM    |       |       |       | Fold change |           |
|--------------|--------------|----------------------------------------------------------------------------------------------------------------------------------------------------------------------|--------|-------|-------|-------|-------------|-----------|
|              |              |                                                                                                                                                                      | Called | FSN   | FDR   | q-val | mean        | Range     |
| MTMR14       | A_24_P388502 | myotubularin related protein 14 (MTMR14), transcript variant 3, mRNA [NM_022485]                                                                                     | 74     | 1,426 | 1,927 | 1,44  | 1,37        | 0,88-4,14 |
| TMEM97       | A_32_P201521 | transmembrane protein 97 (TMEM97), mRNA [NM_014573]                                                                                                                  | 75     | 1,426 | 1,901 | 1,55  | 0,58        | 0,27-1,03 |
| FLJ36031     | A_23_P377982 | hypothetical protein FLJ36031 (FLJ36031), mRNA [NM_175884]                                                                                                           | 76     | 1,426 | 1,876 | 1,44  | 2,06        | 0,63-5,49 |
| FOXD3        | A_23_P46560  | forkhead box D3 (FOXD3), mRNA [NM_012183]                                                                                                                            | 77     | 1,426 | 1,852 | 1,44  | 1,61        | 0,84-2,49 |
| GPR155       | A_23_P335958 | G protein-coupled receptor 155 (GPR155), transcript variant 9, mRNA [NM_001033045]                                                                                   | 78     | 1,426 | 1,828 | 1,55  | 0,65        | 0,31-1,62 |
| THC2537951   | A_32_P217330 | ALU1_HUMAN (P39188) Alu subfamily J sequence contamination warning entry, partial (27%) [THC2537674]                                                                 | 79     | 1,426 | 1,805 | 1,44  | 1,52        | 0,95-2,22 |
| DIS3L2       | A_23_P113888 | DIS3 mitotic control homolog (S, cerevisiae)-like 2 (DIS3L2), mRNA [NM_152383]                                                                                       | 80     | 1,426 | 1,782 | 1,44  | 1,49        | 0,74-2,27 |
| THC2708124   | A_32_P73304  | Unknown                                                                                                                                                              | 81     | 1,426 | 1,76  | 1,55  | 0,65        | 0,26-2,75 |
| AK024470     | A_24_P84370  | mRNA for FLJ00063 protein, partial cds, [AK024470]                                                                                                                   | 82     | 1,426 | 1,739 | 1,44  | 1,92        | 1,12-6,35 |
| WASF2        | A_32_P41461  | WAS protein family, member 2 (WASF2), mRNA [NM_006990]                                                                                                               | 83     | 1,426 | 1,718 | 1,55  | 0,59        | 0,25-3,08 |
| INPPL1       | A_23_P36322  | inositol polyphosphate phosphatase-like 1 (INPPL1), mRNA [NM_001567]                                                                                                 | 84     | 1,426 | 1,698 | 1,44  | 1,61        | 0,71-2,16 |
| LOC344382    | A_24_P135579 | PREDICTED: Homo sapiens similar to uninteracting protein (LOC344382), mRNA [XM_293026]                                                                               | 85     | 1,426 | 1,678 | 1,44  | 1,24        | 1,05-2,29 |
| BC031320     | A_24_P523061 | cDNA clone IMAGE:5278682, [BC031320]                                                                                                                                 | 86     | 1,426 | 1,658 | 1,44  | 1,32        | 0,78-1,98 |
| ZW10         | A_23_P64204  | ZW10, kinetochore associated, homolog (Drosophila) (ZW10), mRNA [NM_004724]                                                                                          | 87     | 1,426 | 1,639 | 1,44  | 1,35        | 0,83-2,69 |
| COBRA1       | A_23_P148150 | cofactor of BRCA1 (COBRA1), mRNA [NM_015456]                                                                                                                         | 88     | 1,426 | 1,62  | 1,44  | 1,33        | 0,65-1,86 |
| SUZ12P       | A_24_P889103 | full-length cDNA clone CS0DC012YL18 of Neuroblastoma Cot 25-normalized of Homo sapiens (human), [CR597846]                                                           | 89     | 1,426 | 1,602 | 1,44  | 1,73        | 0,91-2,96 |
| GRB7         | A_23_P163992 | growth factor receptor-bound protein 7 (GRB7), transcript variant 1, mRNA [NM_005310]                                                                                | 90     | 1,426 | 1,584 | 1,44  | 1,62        | 0,55-3,23 |
| DTNB         | A_24_P216421 | dystrobrevin, beta (DTNB), transcript variant 3, mRNA [NM_033148]                                                                                                    | 91     | 1,426 | 1,567 | 1,44  | 1,66        | 0,23-2,53 |
| A_32_P194182 | A_32_P194182 | Unknown                                                                                                                                                              | 92     | 1,426 | 1,55  | 1,55  | 0,68        | 0,43-1,52 |
| F11R         | A_24_P319369 | F11 receptor (F11R), mRNA [NM_016946]                                                                                                                                | 93     | 1,426 | 1,533 | 1,44  | 1,48        | 0,21-2,39 |
| BC016384     | A_24_P677890 | clone IMAGE:4703872, mRNA, [BC016384]                                                                                                                                | 94     | 1,426 | 1,517 | 1,44  | 1,35        | 1,07-3,74 |
| ALS2CL       | A_32_P420009 | ALS2 C-terminal like (ALS2CL), transcript variant 1, mRNA [NM_147129]                                                                                                | 95     | 1,426 | 1,501 | 1,44  | 1,82        | 0,60-2,76 |
| SLC25A4      | A_24_P206047 | solute carrier family 25 (mitochondrial carrier; adenine nucleotide translocator), member 4 (SLC25A4), nuclear gene encoding mitochondrial protein, mRNA [NM_001151] | 96     | 1,426 | 1,485 | 1,44  | 1,48        | 0,56-2,06 |
| TSC22D3      | A_23_P217688 | TSC22 domain family, member 3 (TSC22D3), transcript variant 2, mRNA [NM_004089]                                                                                      | 97     | 1,426 | 1,47  | 1,44  | 1,91        | 0,55-3,56 |
| A_24_P195528 | A_24_P195528 | Unknown                                                                                                                                                              | 98     | 1,426 | 1,455 | 1,44  | 1,58        | 0,59-2,98 |
| BAG3         | A_23_P47077  | BCL2-associated athanogene 3 (BAG3), mRNA [NM_004281]                                                                                                                | 99     | 1,426 | 1,44  | 1,44  | 1,82        | 0,44-3,50 |

| Gene Name       | Agilent ID   | Description                                                                                                                          | SAM    |       |       |       | Fold change |            |
|-----------------|--------------|--------------------------------------------------------------------------------------------------------------------------------------|--------|-------|-------|-------|-------------|------------|
|                 |              |                                                                                                                                      | Called | FSN   | FDR   | q-val | mean        | Range      |
| PTPRE           | A_24_P213503 | protein tyrosine phosphatase, receptor type, E (PTPRE), transcript variant 1, mRNA [NM_006504]                                       | 100    | 2,139 | 2,139 | 1,678 | 0,58        | 0,10-1,94  |
| VPRBP           | A_23_P212595 | Vpr (HIV-1) binding protein (VPRBP), mRNA [NM_014703]                                                                                | 101    | 2,139 | 2,118 | 1,55  | 1,47        | 1,03-3,20  |
| FXR2            | A_23_P4007   | fragile X mental retardation, autosomal homolog 2 (FXR2), mRNA [NM_004860]                                                           | 102    | 2,139 | 2,097 | 1,55  | 1,83        | 0,25-4,84  |
| CYP2D6          | A_23_P155123 | cytochrome P450, family 2, subfamily D, polypeptide 6 (CYP2D6), transcript variant 1, mRNA [NM_000106]                               | 103    | 2,139 | 2,077 | 1,55  | 1,51        | 0,46-3,38  |
| A_24_P812172    | A_24_P812172 | Unknown                                                                                                                              | 104    | 2,139 | 2,057 | 1,55  | 1,94        | 0,57-4,80  |
| RASD1           | A_23_P118392 | RAS, dexamethasone-induced 1 (RASD1), mRNA [NM_016084]                                                                               | 105    | 2,139 | 2,037 | 1,55  | 3,14        | 0,88-21,55 |
| C8orf73         | A_23_P369641 | chromosome 8 open reading frame 73 (C8orf73), mRNA [NM_001100878]                                                                    | 106    | 2,139 | 2,018 | 1,55  | 1,7         | 0,43-4,02  |
| SLC13A2         | A_23_P107307 | solute carrier family 13 (sodium-dependent dicarboxylate transporter), member 2 (SLC13A2), mRNA [NM_003984]                          | 107    | 2,139 | 1,999 | 1,55  | 1,62        | 0,87-2,71  |
| HIRIP3          | A_24_P142269 | HIRA interacting protein 3 (HIRIP3), mRNA [NM_003609]                                                                                | 108    | 2,139 | 1,98  | 1,55  | 1,51        | 0,36-2,84  |
| ENST00000307533 | A_24_P89038  | LOC93622 protein (Putative uncharacterized protein LOC93622) (cDNA, FLJ95718) [Source:UniProtKB/TrEMBL;Acc:Q8WU25] [ENST00000307533] | 109    | 2,139 | 1,962 | 1,55  | 1,79        | 0,59-2,38  |
| RGMB            | A_24_P363100 | RGM domain family, member B (RGMB), transcript variant 2, mRNA [NM_173670]                                                           | 110    | 2,139 | 1,944 | 1,55  | 1,41        | 0,82-2,36  |
| ARID5B          | A_23_P97871  | AT rich interactive domain 5B (MRF1-like) (ARID5B), mRNA [NM_032199]                                                                 | 111    | 2,139 | 1,927 | 1,55  | 2,11        | 0,81-3,00  |
| IGF2BP2         | A_23_P250156 | insulin-like growth factor 2 mRNA binding protein 2 (IGF2BP2), transcript variant 1, mRNA [NM_006548]                                | 112    | 2,139 | 1,91  | 1,55  | 1,6         | 1,09-3,09  |
| SP100           | A_24_P916816 | nuclear autoantigen mRNA, partial cds; alternatively spliced, [L79989]                                                               | 113    | 2,139 | 1,893 | 1,678 | 0,49        | 0,15-3,15  |
| A_24_P349580    | A_24_P349580 | Unknown                                                                                                                              | 114    | 2,139 | 1,876 | 1,55  | 1,38        | 0,75-2,38  |
| A_24_P920081    | A_24_P920081 | Unknown                                                                                                                              | 115    | 2,139 | 1,86  | 1,55  | 1,57        | 0,76-4,11  |
| H6PD            | A_24_P626850 | hexose-6-phosphate dehydrogenase (glucose 1-dehydrogenase) (H6PD), mRNA [NM_004285]                                                  | 116    | 2,139 | 1,844 | 1,55  | 2,6         | 0,26-4,61  |
| SAPS2           | A_23_P95353  | SAPS domain family, member 2 (SAPS2), mRNA [NM_014678]                                                                               | 117    | 2,139 | 1,828 | 1,55  | 1,51        | 0,86-2,13  |
| SPAG9           | A_24_P365025 | sperm associated antigen 9 (SPAG9), transcript variant 3, mRNA [NM_003971]                                                           | 118    | 2,139 | 1,813 | 1,55  | 1,42        | 0,93-1,94  |
| NDRG1           | A_24_P38387  | N-myc downstream regulated 1 (NDRG1), transcript variant 2, mRNA [NM_006096]                                                         | 119    | 2,139 | 1,797 | 1,55  | 1,67        | 0,98-4,09  |
| ENST00000312412 | A_24_P690235 | cDNA FLJ43844 fis, clone TEST14006308, highly similar to Puromycin-sensitive aminopeptidase (EC 3,4,11,-), [AK125832]                | 120    | 2,139 | 1,782 | 1,55  | 1,49        | 0,14-2,16  |
| A_24_P170365    | A_24_P170365 | Unknown                                                                                                                              | 121    | 2,139 | 1,768 | 1,55  | 1,85        | 0,68-4,24  |
| RHOU            | A_23_P114814 | ras homolog gene family, member U (RHOU), mRNA [NM_021205]                                                                           | 122    | 2,139 | 1,753 | 1,55  | 2,68        | 0,71-3,65  |
| DHRS11          | A_23_P27005  | dehydrogenase/reductase (SDR family) member 11 (DHRS11), mRNA [NM_024308]                                                            | 123    | 2,139 | 1,739 | 1,55  | 1,38        | 1,02-3,10  |

| Gene Name    | Agilent ID   | Description                                                                                                                                                 | SAM    |       |       |       | Fold change |           |
|--------------|--------------|-------------------------------------------------------------------------------------------------------------------------------------------------------------|--------|-------|-------|-------|-------------|-----------|
|              |              |                                                                                                                                                             | Called | FSN   | FDR   | q-val | mean        | Range     |
| RNPEP        | A_24_P68649  | arginyl aminopeptidase (aminopeptidase B) (RNPEP), mRNA [NM_020216]                                                                                         | 124    | 2,139 | 1,725 | 1,55  | 2,35        | 0,27-3,54 |
| CHST10       | A_23_P102351 | carbohydrate sulfotransferase 10 (CHST10), mRNA [NM_004854]                                                                                                 | 125    | 2,139 | 1,711 | 1,55  | 1,5         | 0,33-3,35 |
| CA314936     | A_32_P140228 | UI-CF-FN0-afi-d-17-0-UI,s1 UI-CF-FN0 Homo sapiens cDNA clone UI-CF-FN0-afi-d-17-0-UI 3', mRNA sequence [CA314936]                                           | 126    | 2,139 | 1,698 | 1,55  | 2,16        | 0,39-4,08 |
| SSBP2        | A_23_P33791  | single-stranded DNA binding protein 2 (SSBP2), mRNA [NM_012446]                                                                                             | 127    | 2,139 | 1,684 | 1,55  | 1,33        | 0,71-1,76 |
| BRCC3        | A_23_P217659 | BRCA1/BRCA2-containing complex, subunit 3 (BRCC3), transcript variant 2, mRNA [NM_001018055]                                                                | 128    | 2,139 | 1,671 | 1,55  | 1,47        | 0,89-3,17 |
| SPG7         | A_24_P5305   | spastic paraplegia 7 (pure and complicated autosomal recessive) (SPG7), nuclear gene encoding mitochondrial protein, transcript variant 1, mRNA [NM_003119] | 129    | 2,139 | 1,658 | 1,55  | 1,83        | 0,84-3,97 |
| MFGE8        | A_24_P133584 | milk fat globule-EGF factor 8 protein (MFGE8), transcript variant 1, mRNA [NM_005928]                                                                       | 130    | 2,139 | 1,645 | 1,55  | 1,56        | 0,85-2,51 |
| A_24_P152144 | A_24_P152144 | Unknown                                                                                                                                                     | 131    | 2,139 | 1,633 | 1,55  | 1,51        | 0,63-2,53 |
| CHKA         | A_23_P136135 | choline kinase alpha (CHKA), transcript variant 1, mRNA [NM_001277]                                                                                         | 132    | 2,139 | 1,62  | 1,55  | 1,45        | 0,50-2,57 |
| RBM8A        | A_23_P305335 | RNA binding motif protein 8A, mRNA (cDNA clone IMAGE:4687764), complete cds, [BC017770]                                                                     | 133    | 2,139 | 1,608 | 1,55  | 1,95        | 0,85-3,33 |
| BC063542     | A_32_P135790 | cDNA clone IMAGE:4525305, ****<br>WARNING: chimeric clone ****,<br>[BC063542]                                                                               | 134    | 2,139 | 1,596 | 1,55  | 1,93        | 0,71-3,76 |
| A_24_P460195 | A_24_P460195 | Unknown                                                                                                                                                     | 135    | 2,139 | 1,584 | 1,55  | 2,36        | 0,37-5,36 |
| DFNB31       | A_23_P83351  | deafness, autosomal recessive 31 (DFNB31), transcript variant 1, mRNA [NM_015404]                                                                           | 136    | 2,139 | 1,573 | 1,55  | 1,51        | 0,40-3,71 |
| LOC388152    | A_23_P305981 | cDNA FLJ90297 fis, clone NT2RP2000447, moderately similar to GOLGIN-95, [AK074778]                                                                          | 137    | 2,139 | 1,561 | 1,55  | 1,68        | 0,84-2,65 |
| CARS         | A_24_P95439  | cysteinyI-tRNA synthetase (CARS), transcript variant 4, mRNA [NM_001014438]                                                                                 | 138    | 2,139 | 1,55  | 1,55  | 1,66        | 0,66-3,26 |
| BI024548     | A_32_P74942  | BI024548 PM3-MT0205-300101-005-f07 MT0205 Homo sapiens cDNA, mRNA sequence [BI024548]                                                                       | 139    | 2,852 | 2,052 | 1,678 | 0,67        | 0,14-2,80 |
| RASAL1       | A_23_P139600 | RAS protein activator like 1 (GAP1 like) (RASAL1), mRNA [NM_004658]                                                                                         | 140    | 2,852 | 2,037 | 1,648 | 1,46        | 0,38-2,41 |
| A_24_P33055  | A_24_P33055  | Unknown                                                                                                                                                     | 141    | 2,852 | 2,023 | 1,648 | 1,38        | 0,92-2,47 |
| CAMK1D       | A_23_P124252 | calcium/calmodulin-dependent protein kinase ID (CAMK1D), transcript variant 1, mRNA [NM_020397]                                                             | 142    | 2,852 | 2,008 | 1,648 | 1,58        | 1,00-3,03 |
| TMEM19       | A_24_P358976 | transmembrane protein 19 (TMEM19), mRNA [NM_018279]                                                                                                         | 143    | 2,852 | 1,994 | 1,678 | 0,71        | 0,40-0,93 |
| ATP1A4       | A_23_P160177 | ATPase, Na <sup>+</sup> /K <sup>+</sup> transporting, alpha 4 polypeptide (ATP1A4), transcript variant 1, mRNA [NM_144699]                                  | 144    | 2,852 | 1,98  | 1,648 | 1,64        | 0,77-3,35 |
| ANO1         | A_23_P98304  | anoctamin 1, calcium activated chloride channel (ANO1), mRNA [NM_018043]                                                                                    | 145    | 2,852 | 1,967 | 1,648 | 1,48        | 0,59-2,05 |
| A_32_P78488  | A_32_P78488  | Unknown                                                                                                                                                     | 146    | 2,852 | 1,953 | 1,648 | 1,35        | 0,90-1,96 |
| UBL4A        | A_23_P62361  | ubiquitin-like 4A (UBL4A), mRNA [NM_014235]                                                                                                                 | 147    | 2,852 | 1,94  | 1,648 | 1,64        | 0,36-3,54 |

| Gene Name    | Agilent ID   | Description                                                                                                                         | SAM    |       |       |       | Fold change |            |
|--------------|--------------|-------------------------------------------------------------------------------------------------------------------------------------|--------|-------|-------|-------|-------------|------------|
|              |              |                                                                                                                                     | Called | FSN   | FDR   | q-val | mean        | Range      |
| SDHA         | A_32_P67259  | succinate dehydrogenase complex, subunit A, flavoprotein (Fp) (SDHA), nuclear gene encoding mitochondrial protein, mRNA [NM_004168] | 148    | 2,852 | 1,927 | 1,648 | 1,42        | 0,54-2,68  |
| CNOT3        | A_23_P38987  | CCR4-NOT transcription complex, subunit 3 (CNOT3), mRNA [NM_014516]                                                                 | 149    | 2,852 | 1,914 | 1,648 | 1,3         | 0,75-2,22  |
| ARHGEF9      | A_24_P254551 | Cdc42 guanine nucleotide exchange factor (GEF) 9 (ARHGEF9), mRNA [NM_015185]                                                        | 150    | 2,852 | 1,901 | 1,648 | 1,8         | 0,76-4,15  |
| STK35        | A_24_P940537 | serine/threonine kinase 35 (STK35), mRNA [NM_080836]                                                                                | 151    | 2,852 | 1,889 | 1,648 | 1,6         | 0,52-3,00  |
| DDR1         | A_23_P93311  | discoidin domain receptor tyrosine kinase 1 (DDR1), transcript variant 1, mRNA [NM_013993]                                          | 152    | 2,852 | 1,876 | 1,648 | 1,74        | 0,40-3,20  |
| C3orf39      | A_24_P217330 | chromosome 3 open reading frame 39 (C3orf39), mRNA [NM_032806]                                                                      | 153    | 2,852 | 1,864 | 1,648 | 1,42        | 0,48-2,69  |
| ZKSCAN5      | A_24_P317637 | zinc finger with KRAB and SCAN domains 5 (ZKSCAN5), transcript variant 1, mRNA [NM_014569]                                          | 154    | 2,852 | 1,852 | 1,648 | 1,61        | 0,73-2,22  |
| TBC1D17      | A_23_P130731 | TBC1 domain family, member 17 (TBC1D17), mRNA [NM_024682]                                                                           | 155    | 2,852 | 1,84  | 1,648 | 1,26        | 0,36-2,11  |
| RNF215       | A_32_P420563 | ring finger protein 215 (RNF215), mRNA [NM_001017981]                                                                               | 156    | 2,852 | 1,828 | 1,648 | 1,79        | 0,61-2,98  |
| LOC100130713 | A_24_P119405 | cDNA FLJ39247 fis, clone OCBBF2008520, [AK096566]                                                                                   | 157    | 2,852 | 1,816 | 1,648 | 1,81        | 0,96-3,49  |
| PPP2R3B      | A_23_P45517  | protein phosphatase 2 (formerly 2A), regulatory subunit B", beta (PPP2R3B), transcript variant 1, mRNA [NM_013239]                  | 158    | 2,852 | 1,805 | 1,648 | 1,29        | 0,54-2,17  |
| EPHA1        | A_23_P157333 | EPH receptor A1 (EPHA1), mRNA [NM_005232]                                                                                           | 159    | 2,852 | 1,794 | 1,648 | 1,67        | 0,55-2,95  |
| GPR65        | A_23_P14564  | G protein-coupled receptor 65 (GPR65), mRNA [NM_003608]                                                                             | 160    | 2,852 | 1,782 | 1,678 | 0,61        | 0,35-4,64  |
| RMND5A       | A_24_P114339 | required for meiotic nuclear division 5 homolog A (S. cerevisiae) (RMND5A), mRNA [NM_022780]                                        | 161    | 2,852 | 1,771 | 1,648 | 2,08        | 0,76-4,92  |
| CR616003     | A_24_P65597  | gb full-length cDNA clone CS0DM012YB14 of Fetal liver of Homo sapiens (human), [CR616003]                                           | 162    | 2,852 | 1,76  | 1,648 | 2,41        | 0,21-15,71 |
| CYR61        | A_23_P46426  | cysteine-rich, angiogenic inducer, 61 (CYR61), mRNA [NM_001554]                                                                     | 163    | 2,852 | 1,75  | 1,648 | 4,07        | 0,61-12,88 |
| ANGEL2       | A_24_P28622  | angel homolog 2 (Drosophila) (ANGEL2), mRNA [NM_144567]                                                                             | 164    | 2,852 | 1,739 | 1,678 | 0,79        | 0,54-0,98  |
| RNF185       | A_32_P15421  | ring finger protein 185 (RNF185), transcript variant 1, mRNA [NM_152267]                                                            | 165    | 2,852 | 1,728 | 1,648 | 1,5         | 0,62-2,03  |
| UBE2MP1      | A_24_P239017 | ubiquitin-conjugating enzyme E2M pseudogene 1 (UBE2MP1), non-coding RNA [NR_002837]                                                 | 166    | 2,852 | 1,718 | 1,648 | 1,31        | 0,42-9,42  |
| TUBA4A       | A_23_P102109 | tubulin, alpha 4a (TUBA4A), mRNA [NM_006000]                                                                                        | 167    | 2,852 | 1,708 | 1,648 | 1,46        | 0,39-3,22  |
| TSPAN12      | A_23_P145984 | tetraspanin 12 (TSPAN12), mRNA [NM_012338]                                                                                          | 168    | 2,852 | 1,698 | 1,648 | 1,64        | 1,04-3,43  |
| DDR1         | A_24_P367289 | discoidin domain receptor tyrosine kinase 1 (DDR1), transcript variant 1, mRNA [NM_013993]                                          | 169    | 2,852 | 1,687 | 1,648 | 1,51        | 0,29-6,52  |
| X05126       | A_32_P64936  | Human fibroblast mRNA fragment with Alu sequence (pRHF11), [X05126]                                                                 | 170    | 2,852 | 1,678 | 1,678 | 0,66        | 0,39-1,43  |
| GLTPD2       | A_24_P392925 | glycolipid transfer protein domain containing 2 (GLTPD2), mRNA [NM_001014985]                                                       | 171    | 2,852 | 1,668 | 1,648 | 1,57        | 0,77-3,48  |

| Gene Name  | Agilent ID   | Description                                                                                                                                                                                                               | SAM    |       |       |       | Fold change |           |
|------------|--------------|---------------------------------------------------------------------------------------------------------------------------------------------------------------------------------------------------------------------------|--------|-------|-------|-------|-------------|-----------|
|            |              |                                                                                                                                                                                                                           | Called | FSN   | FDR   | q-val | mean        | Range     |
| SLC22A12   | A_23_P35809  | solute carrier family 22 (organic anion/urate transporter), member 12 (SLC22A12), transcript variant 1, mRNA [NM_144585]                                                                                                  | 172    | 2,852 | 1,658 | 1,648 | 1,68        | 0,91-3,22 |
| SIX5       | A_23_P328687 | SIX homeobox 5 (SIX5), mRNA [NM_175875]                                                                                                                                                                                   | 173    | 2,852 | 1,648 | 1,648 | 1,43        | 0,60-2,08 |
| IMMT       | A_24_P351304 | inner membrane protein, mitochondrial (mitofilin) (IMMT), nuclear gene encoding mitochondrial protein, transcript variant 1, mRNA [NM_006839]                                                                             | 174    | 3,565 | 2,049 | 1,791 | 1,23        | 0,59-1,54 |
| ZNF628     | A_32_P409222 | zinc finger protein 628 (ZNF628), mRNA [NM_033113]                                                                                                                                                                        | 175    | 3,565 | 2,037 | 1,791 | 1,25        | 0,63-1,73 |
| L3MBTL     | A_23_P501961 | I(3)mbt-like (Drosophila) (L3MBTL), transcript variant II, mRNA [NM_032107]                                                                                                                                               | 176    | 3,565 | 2,025 | 1,791 | 1,63        | 0,85-2,52 |
| DGCR2      | A_24_P125881 | DiGeorge syndrome critical region gene 2 (DGCR2), mRNA [NM_005137]                                                                                                                                                        | 177    | 3,565 | 2,014 | 1,791 | 1,31        | 0,58-1,59 |
| WAPAL      | A_23_P342185 | wings apart-like homolog (Drosophila) (WAPAL), mRNA [NM_015045]                                                                                                                                                           | 178    | 3,565 | 2,003 | 1,791 | 1,31        | 0,87-1,91 |
| B4GALT4    | A_32_P103945 | UDP-Gal:betaGlcNAc beta 1,4-galactosyltransferase, polypeptide 4 (B4GALT4), transcript variant 1, mRNA [NM_212543]                                                                                                        | 179    | 3,565 | 1,992 | 1,791 | 1,45        | 0,82-2,35 |
| SPRY1      | A_23_P144476 | sprouty homolog 1, antagonist of FGF signaling (Drosophila) (SPRY1), transcript variant 2, mRNA [NM_199327]                                                                                                               | 180    | 3,565 | 1,98  | 1,791 | 1,69        | 0,77-8,90 |
| LRP5L      | A_24_P387514 | low density lipoprotein receptor-related protein 5-like (LRP5L), transcript variant 1, mRNA [NM_182492]                                                                                                                   | 181    | 3,565 | 1,97  | 1,791 | 1,56        | 0,98-3,46 |
| ARHGEF5    | A_24_P389218 | Rho guanine nucleotide exchange factor (GEF) 5 (ARHGEF5), mRNA [NM_005435]                                                                                                                                                | 182    | 3,565 | 1,959 | 1,791 | 1,9         | 0,43-4,10 |
| NFRKB      | A_23_P24485  | nuclear factor related to kappaB binding protein (NFRKB), transcript variant 2, mRNA [NM_006165]                                                                                                                          | 183    | 3,565 | 1,948 | 1,791 | 1,61        | 0,63-3,25 |
| RHOV       | A_23_P117912 | Rho-related GTP-binding protein RhoV (Wnt-1 responsive Cdc42 homolog 2)(WRCH-2)(CDC42-like GTPase 2)(GTP-binding protein-like 2)(Rho GTPase-like protein ARHV) [Source:UniProtKB/Swiss-Prot;Acc:Q96L33] [ENST00000220507] | 184    | 3,565 | 1,937 | 1,791 | 1,6         | 0,25-5,45 |
| CCDC52     | A_23_P109733 | coiled-coil domain containing 52 (CCDC52), mRNA [NM_144718]                                                                                                                                                               | 185    | 3,565 | 1,927 | 1,791 | 1,47        | 0,52-1,90 |
| SLC25A27   | A_23_P81721  | solute carrier family 25, member 27 (SLC25A27), nuclear gene encoding mitochondrial protein, mRNA [NM_004277]                                                                                                             | 186    | 3,565 | 1,917 | 1,791 | 1,82        | 0,86-2,93 |
| SCRN2      | A_23_P4323   | secernin 2 (SCRN2), mRNA [NM_138355]                                                                                                                                                                                      | 187    | 3,565 | 1,906 | 1,791 | 1,35        | 0,82-2,17 |
| AK022337   | A_24_P825969 | cDNA FLJ12275 fis, clone MAMMA1001686, [AK022337]                                                                                                                                                                         | 188    | 3,565 | 1,896 | 1,791 | 1,6         | 0,95-3,98 |
| C20orf151  | A_32_P331052 | chromosome 20 open reading frame 151 (C20orf151), mRNA [NM_080833]                                                                                                                                                        | 189    | 3,565 | 1,886 | 1,791 | 1,32        | 0,38-2,32 |
| GABARAP    | A_23_P27075  | GABA(A) receptor-associated protein (GABARAP), mRNA [NM_007278]                                                                                                                                                           | 190    | 3,565 | 1,876 | 1,81  | 0,79        | 0,57-1,43 |
| CYTH2      | A_23_P119377 | cytohesin 2 (CYTH2), transcript variant 2, mRNA [NM_004228]                                                                                                                                                               | 191    | 3,565 | 1,866 | 1,791 | 1,58        | 0,48-4,52 |
| THC2564025 | A_24_P936051 | BC065015 transmembrane protein 4 {Homo sapiens} (exp=-1; wgp=0; cg=0), partial (8%) [THC2564025]                                                                                                                          | 192    | 3,565 | 1,857 | 1,791 | 1,42        | 0,79-2,76 |
| SETD1A     | A_23_P129678 | SET domain containing 1A (SETD1A), mRNA [NM_014712]                                                                                                                                                                       | 193    | 3,565 | 1,847 | 1,791 | 1,44        | 0,32-2,89 |



| Gene Name    | Agilent ID   | Description                                                                                                                                               | SAM    |       |       |       | Fold change |            |
|--------------|--------------|-----------------------------------------------------------------------------------------------------------------------------------------------------------|--------|-------|-------|-------|-------------|------------|
|              |              |                                                                                                                                                           | Called | FSN   | FDR   | q-val | mean        | Range      |
| EXDL2        | A_23_P205296 | exonuclease 3'-5' domain-like 2 (EXDL2), mRNA [NM_018199]                                                                                                 | 194    | 3,565 | 1,838 | 1,791 | 1,48        | 0,57-2,63  |
| EID2         | A_23_P365844 | EP300 interacting inhibitor of differentiation 2 (EID2), mRNA [NM_153232]                                                                                 | 195    | 3,565 | 1,828 | 1,791 | 1,3         | 0,73-2,81  |
| CYR61        | A_24_P370946 | cysteine-rich, angiogenic inducer, 61 (CYR61), mRNA [NM_001554]                                                                                           | 196    | 3,565 | 1,819 | 1,791 | 5,51        | 0,36-22,80 |
| RFT1         | A_24_P93741  | RFT1 homolog (S, cerevisiae) (RFT1), mRNA [NM_052859]                                                                                                     | 197    | 3,565 | 1,81  | 1,81  | 0,64        | 0,49-1,18  |
| BAHCC1       | A_23_P49539  | BAH domain and coiled-coil containing 1 (BAHCC1), mRNA [NM_001080519]                                                                                     | 198    | 3,565 | 1,8   | 1,791 | 1,55        | 0,74-5,59  |
| RIPK4        | A_23_P211267 | receptor-interacting serine-threonine kinase 4 (RIPK4), mRNA [NM_020639]                                                                                  | 199    | 3,565 | 1,791 | 1,791 | 2,08        | 0,64-4,59  |
| HGS          | A_24_P125993 | hepatocyte growth factor-regulated tyrosine kinase substrate (HGS), mRNA [NM_004712]                                                                      | 200    | 4,278 | 2,139 | 2,008 | 1,76        | 0,59-2,60  |
| A_24_P392099 | A_24_P392099 | Unknown                                                                                                                                                   | 201    | 4,278 | 2,128 | 2,008 | 1,44        | 0,38-3,60  |
| A_24_P455100 | A_24_P455100 | Unknown                                                                                                                                                   | 202    | 4,278 | 2,118 | 2,008 | 1,38        | 1,02-2,06  |
| FOSB         | A_23_P429998 | FBJ murine osteosarcoma viral oncogene homolog B (FOSB), transcript variant 1, mRNA [NM_006732]                                                           | 203    | 4,278 | 2,107 | 2,008 | 2,79        | 0,96-24,26 |
| DCAKD        | A_24_P58331  | dephospho-CoA kinase domain containing (DCAKD), transcript variant 1, mRNA [NM_024819]                                                                    | 204    | 4,278 | 2,097 | 2,008 | 1,89        | 0,41-4,80  |
| SUV420H2     | A_23_P430044 | suppressor of variegation 4-20 homolog 2 (Drosophila) (SUV420H2), mRNA [NM_032701]                                                                        | 205    | 4,278 | 2,087 | 2,008 | 1,41        | 0,89-2,29  |
| EWSR1        | A_23_P91657  | Ewing sarcoma breakpoint region 1 (EWSR1), transcript variant EWS-b, mRNA [NM_013986]                                                                     | 206    | 4,278 | 2,077 | 2,008 | 1,57        | 0,38-2,43  |
| OSMR         | A_24_P145134 | oncostatin M receptor, mRNA (cDNA clone IMAGE:4043935), complete cds, [BC010943]                                                                          | 207    | 4,278 | 2,067 | 2,008 | 1,32        | 0,54-2,17  |
| SFPQ         | A_24_P105283 | splicing factor proline/glutamine-rich (polypyrimidine tract binding protein associated) (SFPQ), mRNA [NM_005066]                                         | 208    | 4,278 | 2,057 | 2,008 | 1,82        | 0,64-3,83  |
| BCKDHB       | A_24_P914513 | branched chain keto acid dehydrogenase E1, beta polypeptide (BCKDHB), nuclear gene encoding mitochondrial protein, transcript variant 1, mRNA [NM_183050] | 209    | 4,278 | 2,047 | 2,008 | 1,55        | 0,62-2,08  |
| SEC24A       | A_23_P329593 | SEC24 related gene family, member A (S, cerevisiae), mRNA (cDNA clone MGC:12985 IMAGE:3355949), complete cds, [BC019341]                                  | 210    | 4,278 | 2,037 | 2,008 | 1,69        | 0,95-4,92  |
| SPRY4        | A_24_P269062 | sprouty homolog 4 (Drosophila) (SPRY4), transcript variant 1, mRNA [NM_030964]                                                                            | 211    | 4,278 | 2,027 | 2,008 | 1,47        | 0,61-2,20  |
| A_24_P837537 | A_24_P837537 | Unknown                                                                                                                                                   | 212    | 4,278 | 2,018 | 2,008 | 1,67        | 0,81-3,35  |
| PC           | A_23_P161647 | pyruvate carboxylase (PC), nuclear gene encoding mitochondrial protein, transcript variant 3, mRNA [NM_001040716]                                         | 213    | 4,278 | 2,008 | 2,008 | 2,22        | 0,72-9,75  |
| THC2662244   | A_32_P108033 | Q26SG8_XANP2 (Q26SG8) Cytochrome C-type biogenesis protein CycL precursor, partial (8%) [THC2662244]                                                      | 214    | 4,278 | 1,999 | 1,999 | 0,48        | 0,22-2,06  |
| ACTR3B       | A_23_P123193 | ARP3 actin-related protein 3 homolog B (yeast) (ACTR3B), transcript variant 1, mRNA [NM_020445]                                                           | 215    | 4,991 | 2,321 | 2,199 | 1,54        | 0,79-2,04  |
| RUNDC2B      | A_32_P66020  | RUN domain containing 2B (RUNDC2B), mRNA [NM_001012391]                                                                                                   | 216    | 4,991 | 2,311 | 2,189 | 0,74        | 0,40-1,69  |

| Gene Name   | Agilent ID   | Description                                                                                                    | SAM    |       |       |       | Fold change |            |
|-------------|--------------|----------------------------------------------------------------------------------------------------------------|--------|-------|-------|-------|-------------|------------|
|             |              |                                                                                                                | Called | FSN   | FDR   | q-val | mean        | Range      |
| DUSP1       | A_23_P110712 | dual specificity phosphatase 1 (DUSP1), mRNA [NM_004417]                                                       | 217    | 4,991 | 2,3   | 2,199 | 3,18        | 0,49-12,69 |
| EXDL2       | A_23_P205293 | exonuclease 3'-5' domain-like 2 (EXDL2), mRNA [NM_018199]                                                      | 218    | 4,991 | 2,289 | 2,199 | 1,31        | 0,58-2,17  |
| KIAA0922    | A_23_P257250 | KIAA0922 (KIAA0922), transcript variant 2, mRNA [NM_015196]                                                    | 219    | 4,991 | 2,279 | 2,199 | 1,75        | 0,83-6,14  |
| ADAMDEC1    | A_23_P256425 | ADAM-like, decysin 1 (ADAMDEC1), mRNA [NM_014479]                                                              | 220    | 4,991 | 2,269 | 2,189 | 0,59        | 0,11-6,10  |
| LOC644450   | A_24_P910030 | hypothetical protein LOC644450, mRNA (cDNA clone IMAGE:4606942), partial cds, [BC022881]                       | 221    | 4,991 | 2,258 | 2,189 | 0,63        | 0,41-1,24  |
| ZFP36       | A_23_P39237  | zinc finger protein 36, C3H type, homolog (mouse) (ZFP36), mRNA [NM_003407]                                    | 222    | 4,991 | 2,248 | 2,199 | 2,21        | 0,07-23,35 |
| PIGS        | A_23_P66715  | phosphatidylinositol glycan anchor biosynthesis, class S (PIGS), mRNA [NM_033198]                              | 223    | 4,991 | 2,238 | 2,199 | 1,45        | 0,45-2,59  |
| TRAM2       | A_23_P58937  | translocation associated membrane protein 2 (TRAM2), mRNA [NM_012288]                                          | 224    | 4,991 | 2,228 | 2,189 | 0,7         | 0,36-1,18  |
| CTNNB1      | A_23_P29499  | catenin (cadherin-associated protein), beta 1, 88kDa (CTNNB1), mRNA [NM_001904]                                | 225    | 4,991 | 2,218 | 2,199 | 1,63        | 0,79-5,30  |
| PEX5        | A_24_P372932 | peroxisomal biogenesis factor 5 (PEX5), transcript variant 2, mRNA [NM_000319]                                 | 226    | 4,991 | 2,208 | 2,199 | 1,7         | 0,56-5,88  |
| TH1L        | A_24_P222126 | TH1-like (Drosophila) (TH1L), transcript variant 1, mRNA [NM_198976]                                           | 227    | 4,991 | 2,199 | 2,199 | 1,3         | 0,47-2,10  |
| THC2498220  | A_24_P936252 | thc Q30VC0_DESDG (Q30VC0) Flagellar biosynthetic protein FlIP, partial (8%) [THC2498220]                       | 228    | 4,991 | 2,189 | 2,189 | 0,43        | 0,11-1,25  |
| A_32_P71864 | A_32_P71864  | Unknown                                                                                                        | 229    | 5,704 | 2,491 | 2,427 | 1,28        | 0,96-2,05  |
| RAVER2      | A_23_P328323 | ribonucleoprotein, PTB-binding 2 (RAVER2), mRNA [NM_018211]                                                    | 230    | 5,704 | 2,48  | 2,427 | 1,66        | 0,99-3,04  |
| CSTF2T      | A_23_P12730  | cleavage stimulation factor, 3' pre-RNA, subunit 2, 64kDa, tau variant (CSTF2T), mRNA [NM_015235]              | 231    | 5,704 | 2,469 | 2,437 | 0,62        | 0,39-1,09  |
| FAM116B     | A_24_P659036 | family with sequence similarity 116, member B (FAM116B), mRNA [NM_001001794]                                   | 232    | 5,704 | 2,458 | 2,427 | 1,42        | 0,28-2,78  |
| FLJ22795    | A_23_P320478 | similar to cis-Golgi matrix protein GM130, mRNA (cDNA clone MGC:70902 IMAGE:6144741), complete cds, [BC065260] | 233    | 5,704 | 2,448 | 2,427 | 1,78        | 0,74-3,57  |
| EVI2B       | A_23_P66694  | ecotropic viral integration site 2B (EVI2B), mRNA [NM_006495]                                                  | 234    | 5,704 | 2,437 | 2,437 | 0,56        | 0,15-3,17  |
| INO80       | A_24_P39454  | INO80 homolog (S. cerevisiae) (INO80), mRNA [NM_017553]                                                        | 235    | 5,704 | 2,427 | 2,427 | 1,51        | 0,63-2,66  |

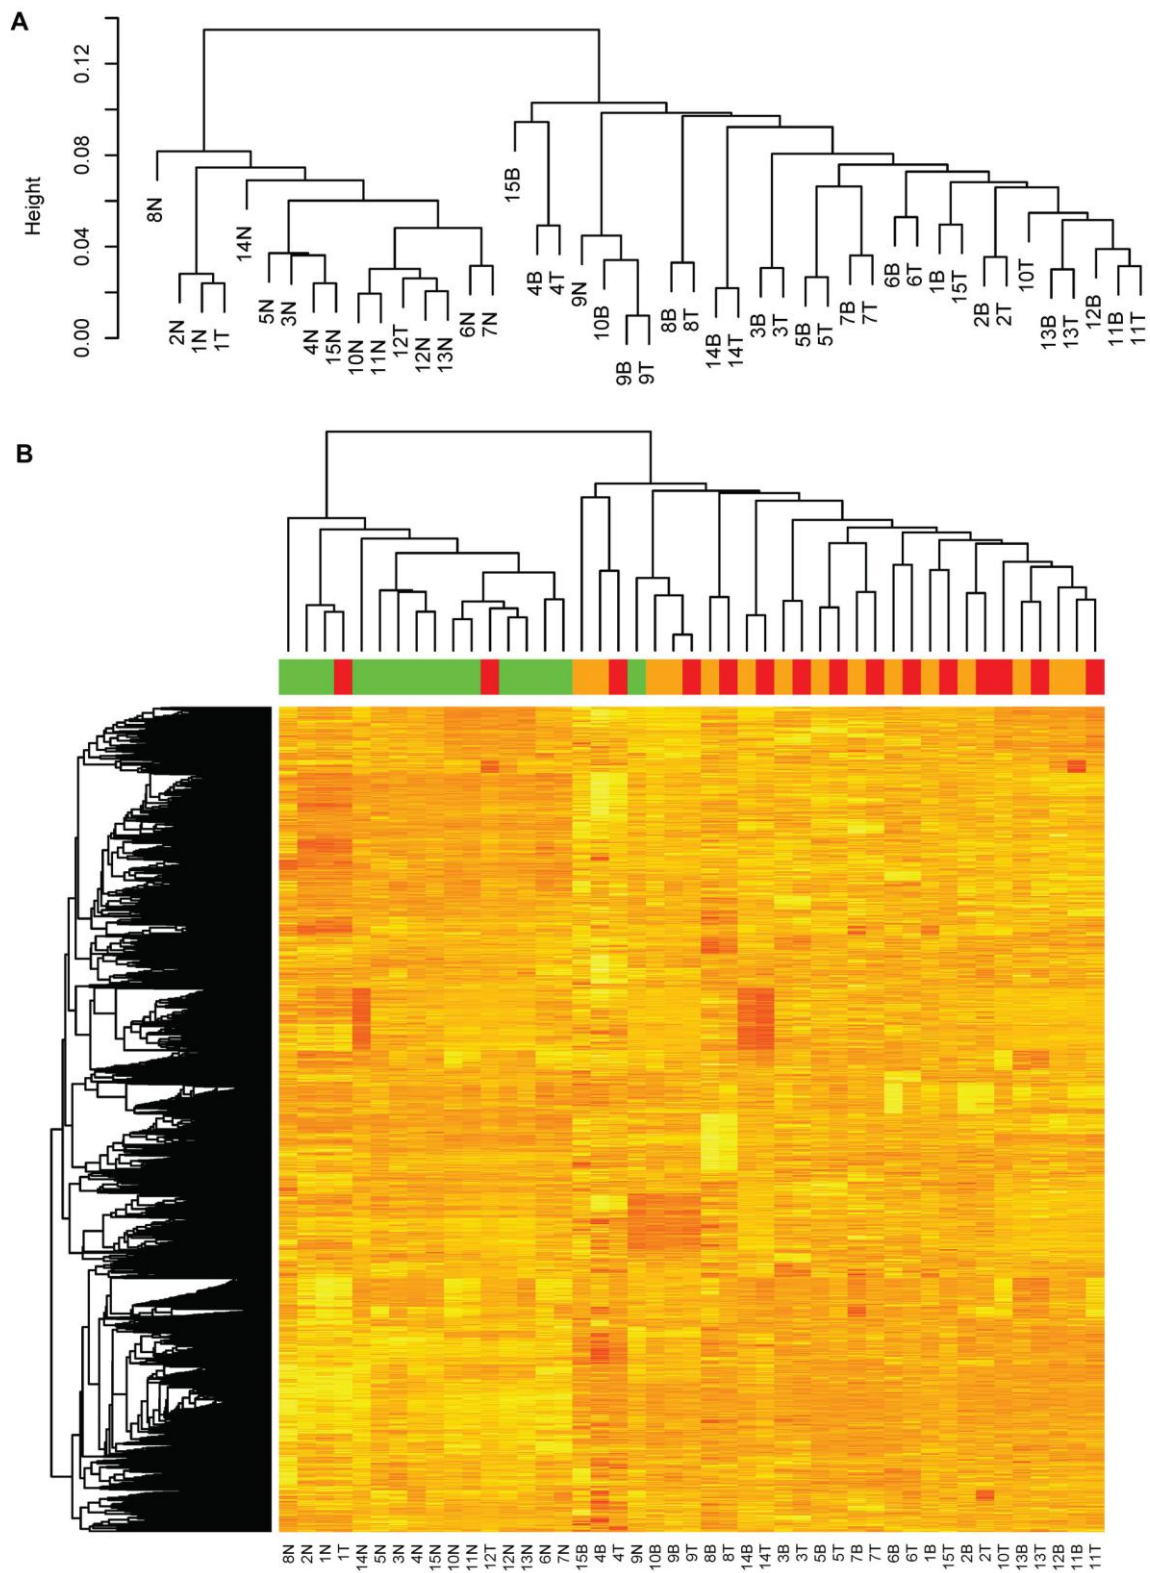

Supplementary fig 1

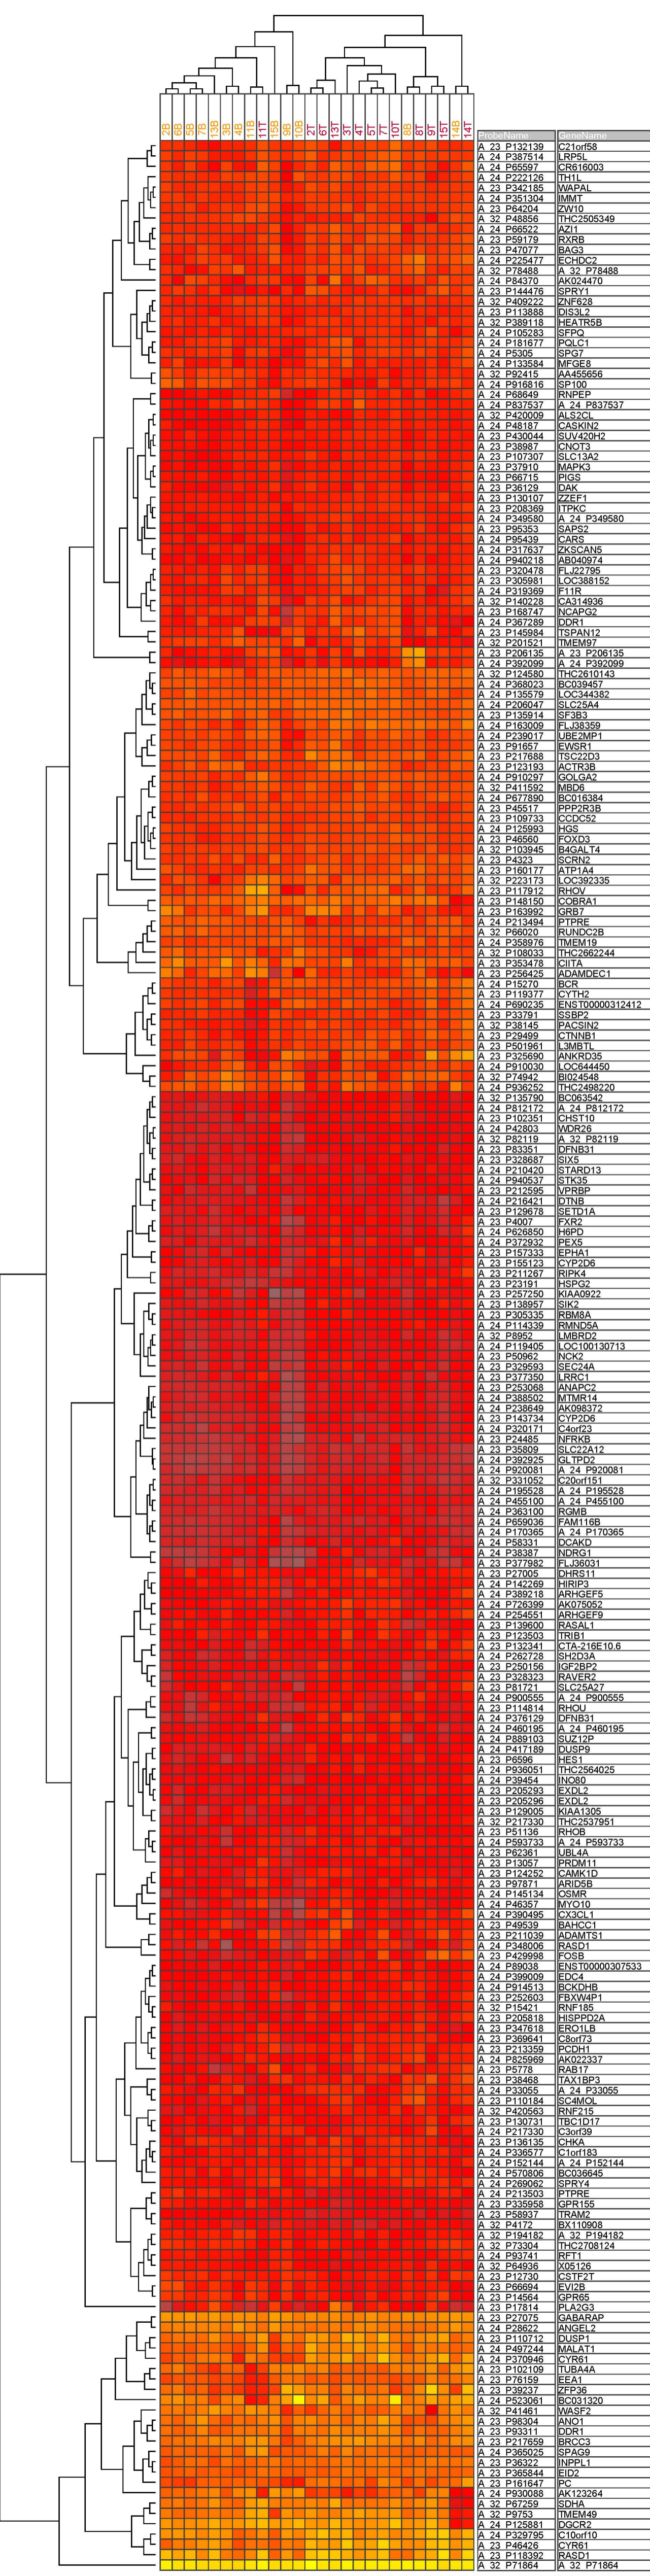

| ProbeName    | GeneName        |
|--------------|-----------------|
| A 23 P132139 | C21orf58        |
| A 24 P387514 | LRP5L           |
| A 24 P65597  | CR616003        |
| A 24 P222126 | TH1L            |
| A 23 P342185 | WAPAL           |
| A 24 P351304 | IMMT            |
| A 23 P64204  | ZW10            |
| A 32 P48856  | THC2505349      |
| A 24 P66522  | AZI1            |
| A 23 P59179  | RXR8            |
| A 23 P47077  | BAG3            |
| A 24 P225477 | ECHDC2          |
| A 32 P78488  | A 32 P78488     |
| A 24 P84370  | AK024470        |
| A 23 P144476 | SPRY1           |
| A 32 P409222 | ZNF628          |
| A 23 P113888 | DIS3L2          |
| A 32 P389118 | HEATR5B         |
| A 24 P105283 | SFPQ            |
| A 24 P181677 | PQLC1           |
| A 24 P5305   | SPG7            |
| A 24 P133584 | MFGE8           |
| A 32 P92415  | AA455656        |
| A 24 P916816 | SP100           |
| A 24 P68649  | RNPEP           |
| A 24 P837537 | A 24 P837537    |
| A 32 P420009 | ALS2CL          |
| A 24 P48187  | CASKIN2         |
| A 23 P430044 | SUV420H2        |
| A 23 P38987  | CNOT3           |
| A 23 P107307 | SLC13A2         |
| A 23 P37910  | MAPK3           |
| A 23 P66715  | PIGS            |
| A 23 P36129  | DAK             |
| A 23 P130107 | ZZEF1           |
| A 23 P208369 | ITPKC           |
| A 24 P349580 | A 24 P349580    |
| A 23 P95353  | SAPS2           |
| A 24 P95439  | CARS            |
| A 24 P317637 | ZKSCAN5         |
| A 24 P940218 | AB040974        |
| A 23 P320478 | FLJ22795        |
| A 23 P305981 | LOC388152       |
| A 24 P319369 | F11R            |
| A 32 P140228 | CA314936        |
| A 23 P168747 | NCAPG2          |
| A 24 P367289 | DDR1            |
| A 23 P145984 | TSPAN12         |
| A 32 P201521 | TMEM97          |
| A 23 P206135 | A 23 P206135    |
| A 24 P392099 | A 24 P392099    |
| A 32 P124580 | THC2610143      |
| A 24 P368023 | BC039457        |
| A 24 P135579 | LOC344382       |
| A 24 P206047 | SLC25A4         |
| A 23 P135914 | SF3B3           |
| A 24 P163009 | FLJ38359        |
| A 24 P239017 | UBE2MP1         |
| A 23 P91657  | EWSR1           |
| A 23 P217688 | TSC22D3         |
| A 23 P123193 | ACTR3B          |
| A 24 P910297 | GOLGA2          |
| A 32 P411592 | MBD6            |
| A 24 P677890 | BC016384        |
| A 23 P45517  | PPP2R3B         |
| A 23 P109733 | CCDC52          |
| A 24 P125993 | HGS             |
| A 23 P46560  | FOXD3           |
| A 32 P103945 | B4GALT4         |
| A 23 P4323   | SCRN2           |
| A 23 P160177 | ATP1A4          |
| A 32 P223173 | LOC392335       |
| A 23 P117912 | RHOV            |
| A 23 P148150 | COBRA1          |
| A 23 P163992 | GRB7            |
| A 24 P213494 | PTPRE           |
| A 32 P66020  | RUNDC2B         |
| A 24 P358976 | TMEM19          |
| A 32 P108033 | THC2662244      |
| A 23 P353478 | CIITA           |
| A 23 P256425 | ADAMDEC1        |
| A 24 P15270  | BCR             |
| A 23 P119377 | CYTH2           |
| A 24 P690235 | ENST00000312412 |
| A 23 P33791  | SSBP2           |
| A 32 P38145  | PACSIN2         |
| A 23 P29499  | CTNBN1          |
| A 23 P501961 | L3MBTL          |
| A 23 P325690 | ANKRD35         |
| A 24 P910030 | LOC644450       |
| A 32 P74942  | BI024548        |
| A 24 P936252 | THC2498220      |
| A 32 P135790 | BC063542        |
| A 24 P812172 | A 24 P812172    |
| A 23 P102351 | CHST10          |
| A 24 P42803  | WDR26           |
| A 32 P82119  | A 32 P82119     |
| A 23 P83351  | DFNB31          |
| A 23 P328687 | SIX5            |
| A 24 P210420 | STARD13         |
| A 23 P940537 | STK35           |
| A 23 P212595 | VPRBP           |
| A 24 P216421 | DTNB            |
| A 23 P129678 | SETD1A          |
| A 23 P4007   | FXR2            |
| A 24 P626850 | H6PD            |
| A 24 P372932 | PEX5            |
| A 23 P157333 | EPHA1           |
| A 23 P155123 | CYP2D6          |
| A 23 P211267 | RIPK4           |
| A 23 P23191  | HSPG2           |
| A 23 P257250 | KIAA0922        |
| A 23 P138957 | SIK2            |
| A 23 P305335 | RBM8A           |
| A 24 P114339 | RMND5A          |
| A 32 P8952   | LMBRD2          |
| A 24 P119405 | LOC100130713    |
| A 23 P50962  | NCK2            |
| A 23 P329593 | SEC24A          |
| A 23 P377350 | LRRC1           |
| A 23 P253068 | ANAPC2          |
| A 24 P388502 | MTMR14          |
| A 24 P238649 | AK098372        |
| A 23 P143734 | CYP2D6          |
| A 24 P320171 | C4orf23         |
| A 23 P24485  | NFRKB           |
| A 23 P35809  | SLC22A12        |
| A 24 P392925 | GLTPD2          |
| A 24 P920081 | A 24 P920081    |
| A 32 P331052 | C20orf151       |
| A 24 P195528 | A 24 P195528    |
| A 24 P455100 | A 24 P455100    |
| A 24 P363100 | RGMB            |
| A 24 P659036 | FAM116B         |
| A 24 P170365 | A 24 P170365    |
| A 24 P58331  | DCAKD           |
| A 24 P38387  | NDRG1           |
| A 23 P377982 | FLJ36031        |
| A 23 P27005  | DHRS11          |
| A 24 P142269 | HIRIP3          |
| A 24 P389218 | ARHGEF5         |
| A 24 P726399 | AK075052        |
| A 24 P254551 | ARHGEF9         |
| A 23 P139600 | RASAL1          |
| A 23 P123503 | TRIB1           |
| A 23 P132341 | CTA-216E10.6    |
| A 24 P262728 | SH2D3A          |
| A 23 P250156 | IGF2BP2         |
| A 23 P328323 | RAVER2          |
| A 23 P81721  | SLC25A27        |
| A 24 P900555 | A 24 P900555    |
| A 23 P114814 | RHO             |
| A 24 P376129 | DFNB31          |
| A 24 P460195 | A 24 P460195    |
| A 24 P889103 | SUZ12P          |
| A 24 P417189 | DUSP9           |
| A 23 P6596   | HES1            |
| A 24 P936051 | THC2564025      |
| A 24 P39454  | INO80           |
| A 23 P205293 | EXDL2           |
| A 23 P205296 | EXDL2           |
| A 23 P129005 | KIAA1305        |
| A 32 P217330 | THC2537951      |
| A 23 P51136  | RHOB            |
| A 24 P593733 | A 24 P593733    |
| A 23 P62361  | UBL4A           |
| A 23 P13057  | PRDM11          |
| A 23 P124252 | CAMK1D          |
| A 23 P97871  | ARID5B          |
| A 24 P145134 | OSMR            |
| A 24 P46357  | MYO10           |
| A 24 P390495 | CX3CL1          |
| A 23 P49539  | BAHCC1          |
| A 23 P211039 | ADAMTS1         |
| A 24 P348006 | RASD1           |
| A 23 P429998 | FOSB            |
| A 24 P89038  | ENST00000307533 |
| A 24 P399009 | EDC4            |
| A 24 P914513 | BCKDHB          |
| A 23 P252603 | FBXW4P1         |
| A 32 P15421  | RNF185          |
| A 23 P205818 | HISPPD2A        |
| A 23 P347618 | ERO1LB          |
| A 23 P369641 | C8orf73         |
| A 23 P213359 | PCDH1           |
| A 24 P825969 | AK022337        |
| A 23 P5778   | RAB17           |
| A 23 P38468  | TAX1BP3         |
| A 24 P33055  | A 24 P33055     |
| A 23 P110184 | SC4MOL          |
| A 32 P420563 | RNF215          |
| A 23 P130731 | TBC1D17         |
| A 24 P217330 | C3orf39         |
| A 23 P136135 | CHKA            |
| A 24 P336577 | C1orf183        |
| A 24 P152144 | A 24 P152144    |
| A 24 P570806 | BC036645        |
| A 24 P269062 | SPRY4           |
| A 23 P213503 | PTPRE           |
| A 24 P335958 | GPR155          |
| A 23 P58937  | TRAM2           |
| A 32 P4172   | BX110908        |
| A 32 P194182 | A 32 P194182    |
| A 32 P73304  | THC2708124      |
| A 24 P93741  | RFT1            |
| A 32 P64936  | X05126          |
| A 23 P12730  | CSTF2T          |
| A 23 P66694  | EVI2B           |
| A 23 P14564  | GPR65           |
| A 23 P17814  | PLA2G3          |
| A 23 P27075  | GABARAP         |
| A 24 P28622  | ANGP2           |
| A 23 P110712 | DUSP1           |
| A 24 P497244 | MALAT1          |
| A 24 P370946 | CYR61           |
| A 23 P102109 | TUBA4A          |
| A 23 P76159  | EEA1            |
| A 23 P39237  | ZFP36           |
| A 24 P523061 | BC031320        |
| A 32 P41461  | WASF2           |
| A 23 P98304  | ANO1            |
| A 23 P93311  | DDR1            |
| A 23 P217659 | BRCC3           |
| A 24 P365025 | SPAG9           |
| A 23 P36322  | INPPL1          |
| A 23 P365844 | EID2            |
| A 23 P161647 | PC              |
| A 24 P930088 | AK123264        |
| A 32 P67259  | SDHA            |
| A 32 P9753   | TMEM49          |
| A 24 P125881 | DGCR2           |
| A 24 P329795 | C10orf10        |
| A 23 P46426  | CYR61           |
| A 23 P118392 | RASD1           |
| A 32 P71864  | A 32 P71864     |

Supplementary fig 2

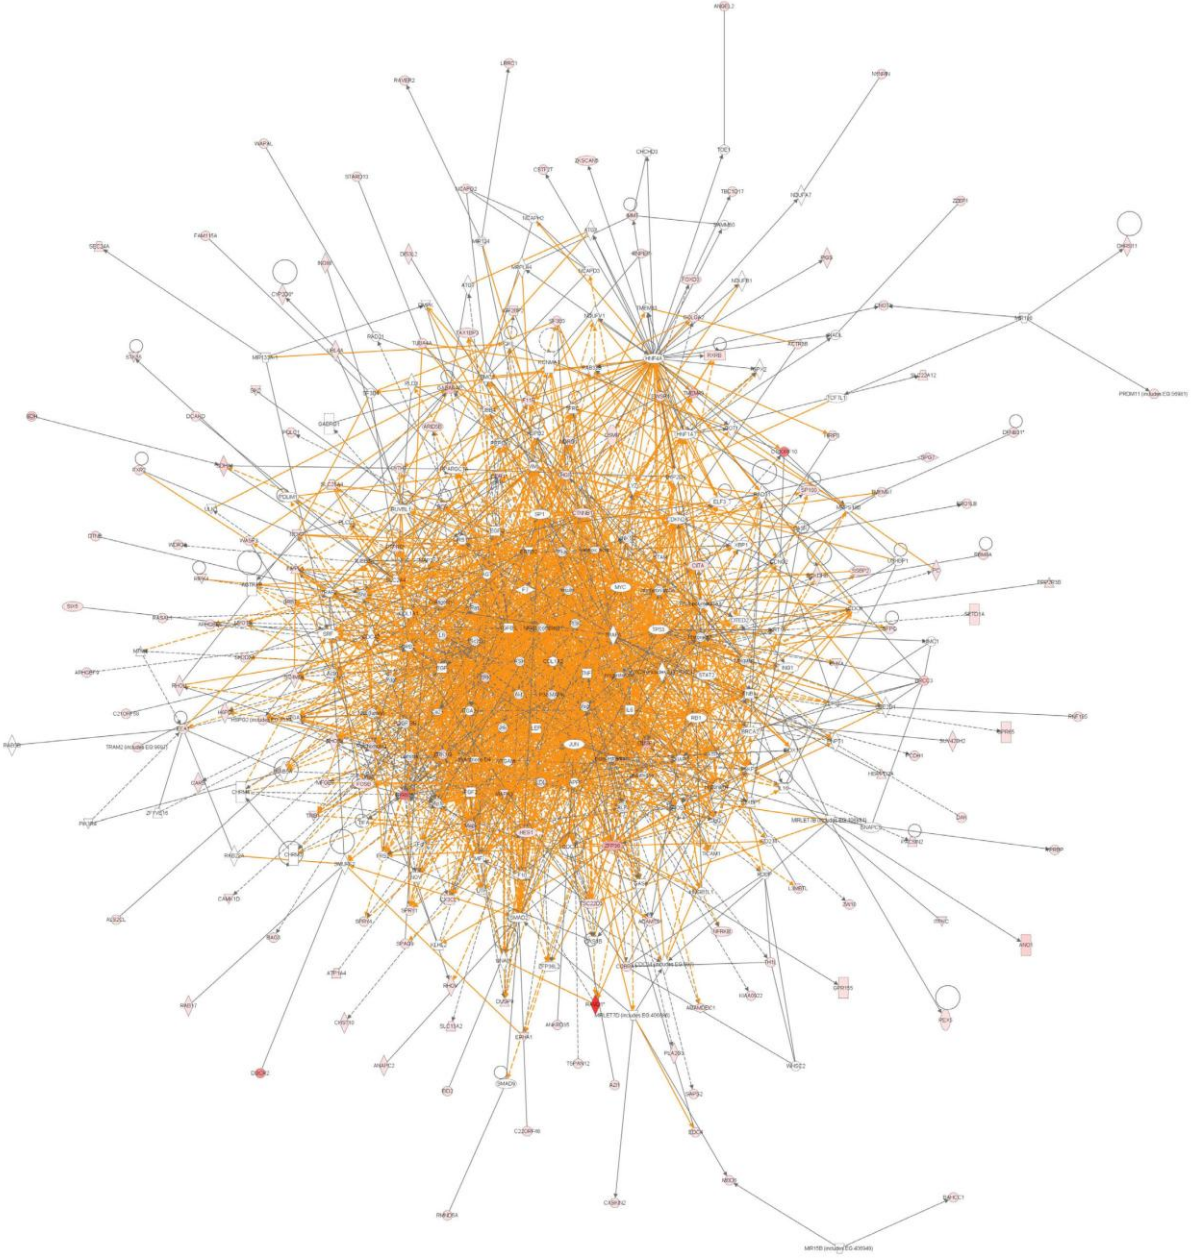

Supplementary fig 3
